# Supplementary material
Source: PubMed Central journal article supplement (PMC528746)
Supplement: pnas_101_45_15905__1.pdf [file pnas_101_45_15905__1.pdf]

10 20 30 40 50

1 M R S S K N V I K E F M R F K V R M E G T V N G H E F E I E G E G E G R P Y E G H N T V K L K V T K dsRed  
 1 M A S S E D V I K E F M R F K V R M E G S V N G H E F E I E G E G E G R P Y E G T Q T A K L K V T K mRFP1  
 1 M S - - - A I K P D M K I N L R M E G N V N G H H F V I D G D G T G K P F E G K Q S M D L E V K E EosFP  
 1 M S - - - L I K P E M K I K L L M E G N V N G H Q F V I E G D G K G H P F E G K Q S M D L V V K E Kaede

60 70 80 90 100

51 G G P L P F A W D I L S P Q F Q Y G S K V Y V K H P A D I P D Y K K L S F P E G F F K W E R V M N F E dsRed  
 51 G G P L P F A W D I L S P Q F Q Y G S K A Y V K H P A D I P D Y L K L S F P E G F F K W E R V M N F E mRFP1  
 47 G G P L P F A F D I L T T A F H Y G N R V F A E Y P D H I Q D Y F K Q S F P K G Y S W E R S L T F E EosFP  
 47 G A P L P F A Y D I L T T A F H Y G N R V F A K Y P D H I P D Y F K Q S F P K G F S W E R S L M F E Kaede

110 120 130 140 150

101 D G G V V T V T Q D S S L Q D G C F I Y K V K F I G V N F P S D G P V M Q K K T M G W E A S T E R L dsRed  
 101 D G G V V T V T Q D S S L Q D G E F I Y K V K L R G T N F P S D G P V M Q K K T M G W E A S T E R M mRFP1  
 97 D G G I C I A R N D I T M E G D T F Y N K V R F H G V N F P A N G P V M Q K K T L K W E P S T E K M EosFP  
 97 D G G V C I A T N D I T L K G D T F F N K V R F D G V N F P P N G P V M Q K K T L K W E A S T E K M Kaede

160 170 180 190 200

151 Y P R D G V L K G E I H K A L K L K D G G H Y L V E F K S I Y M A K - K P V Q L P G Y Y Y V D S K L dsRed  
 151 Y P E D G A L K G E I K M R L K L K D G G H Y D A E V K T T Y M A K - K P V Q L P G A Y K T D I K L mRFP1  
 147 Y V R D G V L T G D I T M A L L L E G N A H Y R C D F R T T Y K A K E K G V K L P G Y H F V D H C I EosFP  
 147 Y L R D G V L T G D I T M A L L L K G D V H Y R C D F R T T Y K S R Q E G V K L P G Y H F V D H C I Kaede

210 220 230

200 D I T S H N E D Y T I V E Q Y E R T E G R H H L F L dsRed  
 200 D I T S H N E D Y T I V E Q Y E R A E G R H S T G A mRFP1  
 197 E I L S H D K D Y N K V K L Y E H A V A H S G L P D N A R R EosFP  
 197 S I L R H D K D Y N E V K L Y E H A V A H S G L P D N V K Kaede
