# Supplementary material
Source: PubMed Central journal article supplement (PMC528746)

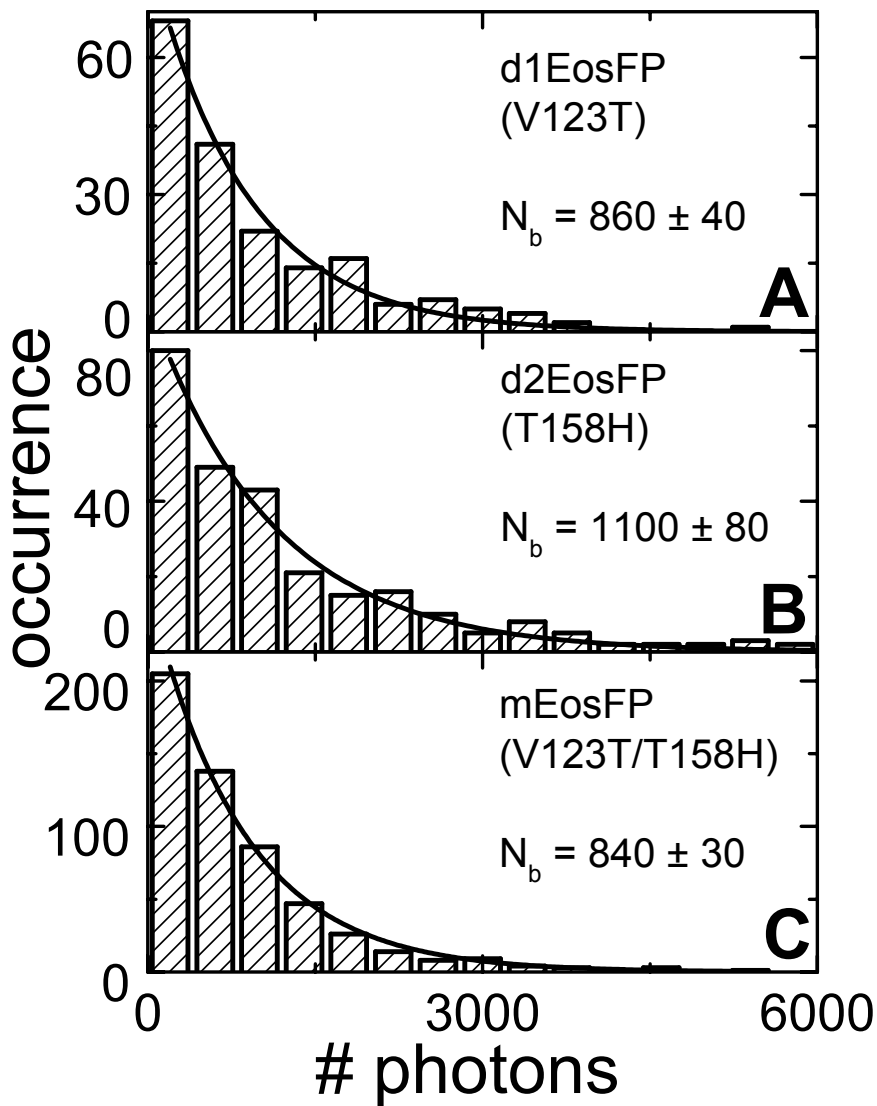

Supplement: pnas_101_45_15905__2.pdf [file pnas_101_45_15905__2.pdf]

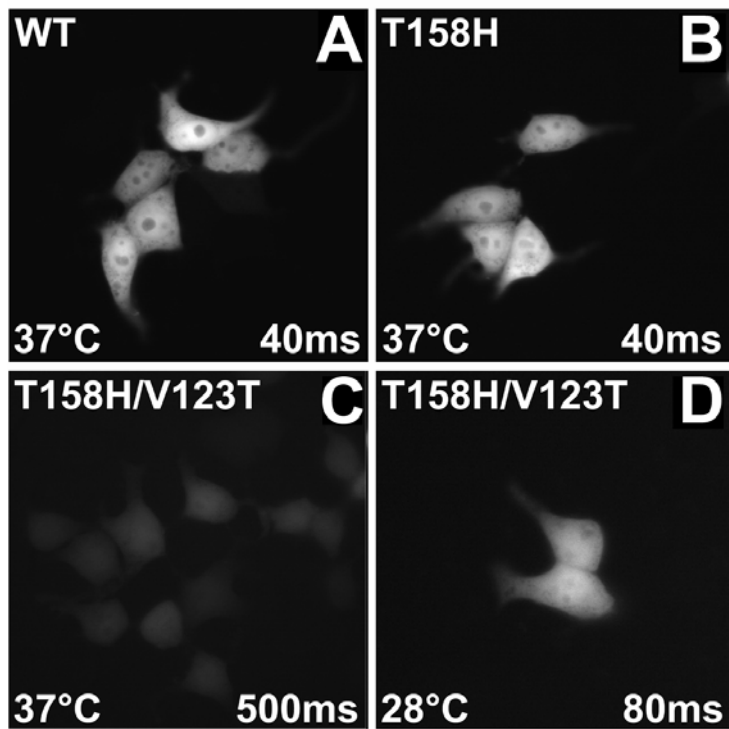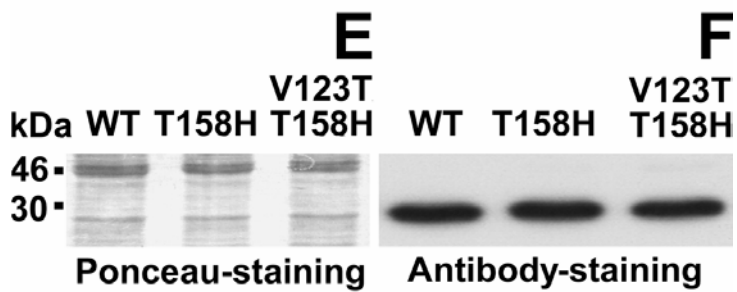

Supplement: pnas_101_45_15905__3.pdf [file pnas_101_45_15905__3.pdf]

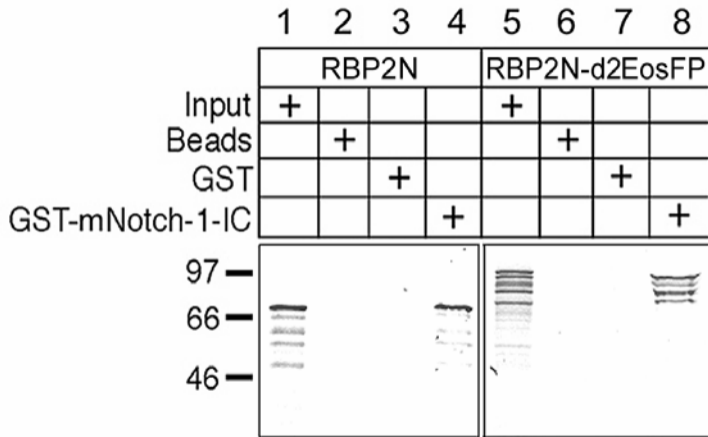

Supplement: pnas_101_45_15905__4.pdf [file pnas_101_45_15905__4.pdf]

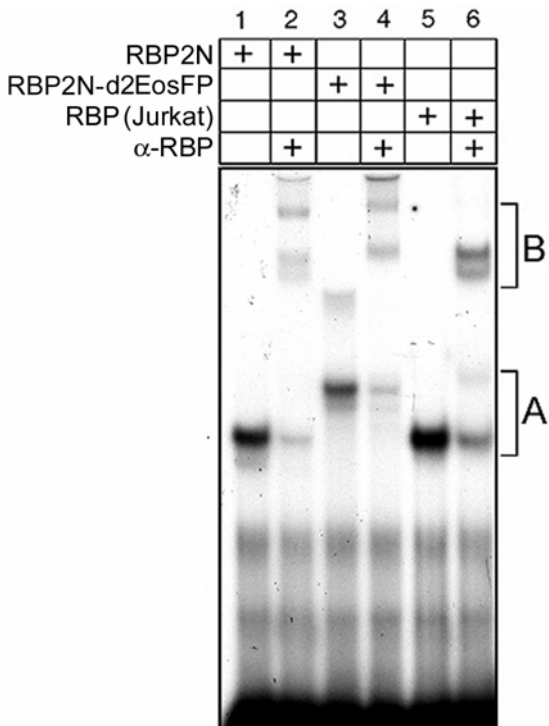

Supplement: pnas_101_45_15905__5.pdf [file pnas_101_45_15905__5.pdf]

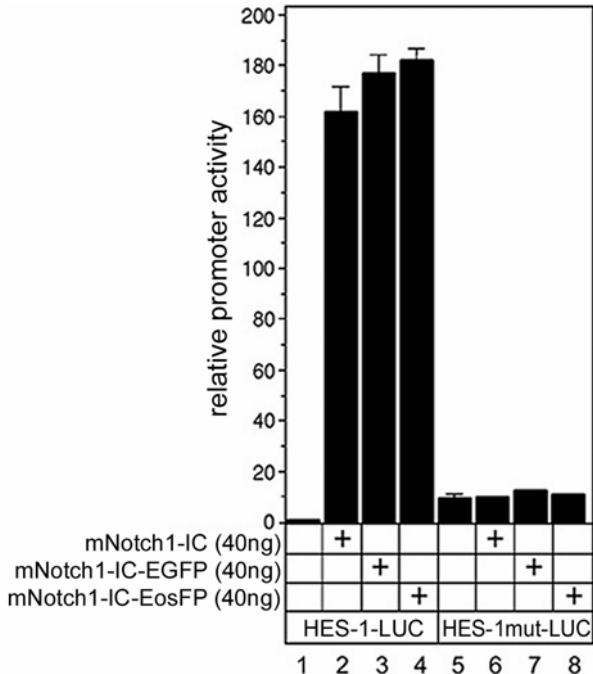

Supplement: pnas_101_45_15905__6.pdf [file pnas_101_45_15905__6.pdf]
